# Supplementary material
Source: PubMed Central journal article supplement (PMC3446615)
Supplement: JVI.01019-12_zjv999096466so1.pdf [file JVI.01019-12_zjv999096466so1.pdf]

```

FEATURES             Location/Qualifiers
    misc_feature     complement(4..34)
                    /note=loxP
    misc_feature     complement(244..717)
                    /note=sopC
    misc_feature     complement(790..1761)
                    /note=sopB
    misc_feature     complement(1761..2927)
                    /note=sopA
    misc_feature     complement(3515..4270)
                    /note=repE
    misc_feature     complement(4599..4665)
                    /note=oriS
    CDS              5610..6269
                    /note=Cm
    misc_feature     6272..12252
                    /mobile_element=transposon:Tn1000
    repeat_region    6272..6306
                    /rpt_type=INVERTED
    CDS              complement(6384..8480)
                    /note=unnamed protein product
                    /note=ORF
                    /codon_start=1
                    /transl_table=11
                    /protein_id=CAA42758.1
                    /db_xref=GI:43087
                    /db_xref=GOA:Q00042
                    /db_xref=UniProtKB/Swiss-Prot:Q00042
                    /translation=MELNITSKSNPFGDTTAENDKKMLSNAFIETADFRTLIETDDRT
                    IVVGRRGTTGKSALFIQLNEHWKKDKKILILSFSPDDSQIIGFRSMLKPFTGFSNLAI
                    ATRLLWRYAMLMEIASYISSHYKLSSQISSETLLNEHLKKWNSAQQGDILRKRLVA
                    YLDENNPEESIGDLQFNLNISEIENNIVSLLERSDRKVVILMDKLDEAYEPDNIGIG
                    IAGLAYASIELNQKAKCIRPIIFLRDNIFRSLSKEDPDYSRNIEGQVIRLHWDWAQL
                    MLSAKRMKVAFKLDIEKDQRVWDRCTADDLKGRNGFKRCLQFTLYRPRDLLSLLN
                    FSAFRENRETIINTDLEYAAKSISMARLEDLWKEYQKIFPSIQVITSAFRSIEPELTV
                    YTCLKKIEASFELIEENGDPKITSEIQLLKASGILQSLYSVGFVGIRDKNTSSYSFCH
                    DGRTPDKGFESNEKLLIHPCYWLGLNLRNALAPEEAEIINDEYDINIISDNSAIRI
                    TIGQITTHLDQIPIGNEGATEFEQWCLDALRIVFASHLTDIKSHPNGNAVQRRDIIC
                    NGGKSDFWKRVLEDYKTRQVVFDAKNFEELGPSEYRQLQSYLTGPYGKLGFIINR
                    EVLKSGKDLDWTKEMYQSHNSLIKLPKYISKLLQKLRNPEKHDAIDRQMGKLLI
                    ETSYMAIKSTQKKRRK
    misc_feature     complement(8496..9047)
                    /gene=tnpR
    CDS              complement(8496..9047)
                    /gene=tnpR
                    /codon_start=1
                    /transl_table=11
                    /product=resolvase

```

/protein\_id=CAA42759.1  
/db\_xref=GI:43088  
/db\_xref=GOA:P03012  
/db\_xref=InterPro:IPR006118  
/db\_xref=InterPro:IPR006119  
/db\_xref=InterPro:IPR006120  
/db\_xref=InterPro:IPR012287  
/db\_xref=PDB:1GDR  
/db\_xref=PDB:1GDT  
/db\_xref=PDB:1GHT  
/db\_xref=PDB:1HX7  
/db\_xref=PDB:1RES  
/db\_xref=PDB:1RET  
/db\_xref=PDB:1ZR2  
/db\_xref=PDB:1ZR4  
/db\_xref=PDB:2GM4  
/db\_xref=PDB:2GM5  
/db\_xref=PDB:2RSL  
/db\_xref=UniProtKB/Swiss-Prot:P03012  
/translation=MRLFGYARVSTSQQSLDIQVRALKDAGVKANRIFTDKASGSSSD  
RKGLDLLRMKVEEGDVILVKKLDRLGRDTADMIQLIKEFDAQGV SIRFIDDGISTD  
MGKMMVVTILSAVAQAERQRILERTNEGRQEAMAKGVVFGKRKRKIDRDAVLNMWC  
ASHISKTMNIARSTVYKVINESN

CDS

9211..12219  
/gene=tnpA  
/codon\_start=1  
/transl\_table=11  
/product=transposase  
/protein\_id=CAA42760.1  
/db\_xref=GI:43089  
/db\_xref=GOA:Q00037  
/db\_xref=InterPro:IPR002513  
/db\_xref=UniProtKB/Swiss-Prot:Q00037  
/translation=MPVDFLTSDQKQNYGCYAAEPNDVQLARYFHLLDERDLAFINQRR  
GKHNRLLGIALQLTTARFLGTFLTDLTQVLPGVQHFVAVQLNIHRPEVLSRYAERD  
TTREHTALIKYGYHEFGDFPWSFRLKRLLYTRAWLSNERPGLMFDFAWLLQNK  
PGATTLVRLISEIRERANQRLWKKLAALPNKWQAAQVMELLVIPEGQRVSALEQLK  
PVTVSGPAFNEALERYIRLSLEFSRLNFSGLPAIQLRNLARYAGMASVKYIARMP  
C RKLAVLTA FVKAQEITALDDAVDVLDM LILDI IREAKKTGQKKRLRTLKDLDQA  
ALLARACALLDDNTDVPDLRQVIFKCVPKNRLAESVSKVNELARPQNNNFHDEMVE  
C VKRFLPAVLRDLHFRAAPAGEHVLAATHYLAELNGSKKRILDDAPEHIITGPWKRL  
L DAEGRIQRAGYSLCLLERLQDALRRRDIWLENSDRWGDPREKLLQGEWQTQRI  
ALGHPVDGRKGVQQLAIQLDETWKAVASRFEKNAEVHICNEGKYPSTISCLEKQ  
PSLLRLNRIKQLLPPVDLTELLEIDAQTGFTHFAHVSESGARAQDLHISLCAVLI  
AEACNIGLEPLIKHNIPALTRHRLSWVKQNYLRAETLVSANARLVDFQSTLELAGR  
I GGEVASADGMRFVTPVKTINSGSNRKYFGSGRGITWYNFVSDQYSGFHGIVVPG  
SIFVLEGLLEQQTGLNPVEIMTDTAGSSDIIFGLFWLLGYQFSPRLADAGEAVFWR  
KSANYGVLDKLRGYADLSKAESQWDEM MRTAGSLKLGTHASELIRSLLKSSRP  
AQAIMEVGRVNKTLYLLNYIDDEDYRRRILTQLNRGEGRHAVARAICYGQRGEIRK

REGQEDQLGALGLVTNAVVLWNTLYMEEALSWMRRNGEEIIEDIARLSPLMHGF  
LGHYTFTLPEDILKGELRALNLNINNELSP

misc\_feature 9211..12219  
/gene=tnpA  
repeat\_region 12218..12252  
/rpt\_type=INVERTED  
misc\_feature complement(12382..12609)  
/note=BGH pA  
CDS complement(12631..13665)  
/note=HygB  
misc\_feature complement(12634..15017)  
/note=pL\_UGIH derived  
misc\_feature complement(13689..14264)  
/note=IRES  
CDS complement(14298..15017)  
/note=GFP  
misc\_feature complement(15018..15023)  
/note=Kozak sequence  
misc\_feature complement(15024..16288)  
/note=pTracer-Er/V5-His A derived  
promoter complement(15102..16288)  
/note=EF-1a Promoter  
misc\_feature complement(16292..16322)  
/note=loxP

BASE COUNT 4292 A 3995 C 3799 G 4241 T 0 OTHER  
ORIGIN ?

1 ATAACTTCGT ATAGCATACA TTATACGAAG TTATTGCAAC GTGCCGGCAC GGCCTGGC  
61 ACCAGGTATT TTGTCCACAT AACCGTGCGC AAAATGTTGT GGATAAGCAG GACACA  
121 CAATCCACAG CAGGCATACA ACCGCACACC GAGGTTACTC CGTTCTACAG GTTACC  
181 CATGTCAATA CTTGCCCTTG ACAGGCATTG ATGGAATCGT AGTCTCACGC TGATAGT  
241 ATCGACAATA CAAGTGGGAC CGTGGTCCCA GACCGATAAT CAGACCGACA ACACG  
301 GATCGTGGTC CCAGACTAAT AATCAGACCG ACGATACGAG TGGGACCGTG GTCCC  
361 AATAATCAGA CCGACGATAC GAGTGGGACC GTGGTTCAG ACTAATAATC AGACCG  
421 TACGAGTGGG ACCGTGGTCC CAGACTAATA ATCAGACCGA CGATACGAGT GGGAC  
481 TCCAGACTA ATAATCAGAC CGACGATACG AGTGGGACCG TGGTCCCAGT CTGATT  
541 GACCGACGAT ACGAGTGGGA CCGTGGTCCC AGACTAATAA TCAGACCGAC GATAC  
601 GGACCGTGGT CCCAGACTAA TAATCAGACC GACGATACGA GTGGGACCGT GGTCC  
661 TGATTATCAG ACCGACGATA CAAGTGGAAC AGTGGGCCCA GAGAGAATAT TCAGG  
721 TATGCTTTCT GGCCTGTAAC AAAGGACATT AAGTAAAGAC AGATAAACGT AGACTA/  
781 GTGGTTCGCAT CAGGGTGCTG GCTTTTCAAG TTCCTTAAGA ATGGCCTCAA TTTTCT  
841 ACACTCAGTT GGAACACGAG ACCTGTCCAG GTTAAGCACC ATTTTATCGC CCTTAT/  
901 TACTGTTCGCT CCAGGAGCAA ACTGATGTCG TGAGCTTAAA CTAGTTCTTG ATGCAG  
961 CGTTTTAAGC ACAGAAGTTA AAAGAGTGAT AACTTCTTCA GCTTCAAATA TCACCCC  
1021 TTTTTTCTGC TCATGAAGGT TAGATGCCTG CTGCTTAAGT AATTCCTCTT TATCTGTA  
1081 GGCTTTTTGA AGTGCATCAC CTGACCGGGC AGATAGTTCA CCGGGGTGAG AAAAA  
1141 AACAACGAT TTAGGCAATT TGGCGGTGTT GATACAGCGG GTAATAATCT TACGTG  
1201 ATTTTCCGCA TCAGCCAGCG CAGAAATATT TCCAGCAAAT TCATTCTGCA ATCGGC  
1261 ATAACGCTGA CCACGTTTCA AAGCACTTGT TGGGCGATAA TCGTTACCCA ATCTGG  
1321 TGCAGCCATC TGCTCATCAT CCAGCTCGCC AACCAGAACA CGATAATCAC TTTTCG

1381 TGCAGCAGCT TTACGACGGC GACTCCCATC GGCAATTTCT ATGACACCAG ATACTC  
1441 ACCGAACGCC GGTGTCTGTT GACCAGTCAG TAGAAAAGAA GGGATGAGAT CATCC  
1501 GTCCTCAGTA AGCAGCTCCT GGTCACGTTT ATTACCTGAC CATAACCGAG AGGTC  
1561 AACACTATCA CCCCAGGAGCA CTTCAAGAGT AAACCTCACA TCCCAGACCAC ATACAC  
1621 AGTAATGGCA TTACCGCGAG CCATTACTCC TACGCGCGCA ATTAACGAAT CCACCA  
1681 GGCAGCTGGT GTCGATAACG AAGTATCTTC AACCGGTTGA GTATTGAGCG TATGTT  
1741 AATAACAGGC GCACGCTTCA TTATCTAATC TCCCAGCGTG GTTTAATCAG ACGATC  
1801 ATTTTCATTGC AGACAGGTTT CCAAATAGAA AGAGCATTTC TCCAGGCACC AGTTGA  
1861 CGTTGATCAA TGGCCTGTTT AAAAACAGTT CTCATCCGGA TCTGACCTTT ACCAAC  
1921 TCCGTTTCAC GTACAACATT TTTTAGAACC ATGCTTCCCC AGGCATCCCG AATTTGC  
1981 TCCATCCACG GGGACTGAGA GCCATTACTA TTGCTGTATT TGGTAAGCAA AATACG  
2041 TCAGGCTCGA ACCCTTTAAG ATCAACGTTT TTGAGCAGAT CACGAAGCAT ATCGAA  
2101 TGCAGTGCAG AGGTGTAGTC AAACAACCTA GCAGGCGTGG GAACAATCAG CACA  
2161 GCACATACGA CATTAACTCG GCCGATACCC AGGTTAGGCG CGCTGTCAAT AACTAT  
2221 TCATAGTCAT GAGCAACAGT TTCAATGGCC AGTCGGAGCA TCAGGTGTGG ATCGG  
2281 AGTTTACCTT CATCAAAATTT GCCATTAAC TCAGTTTCAA TACGGTGCAG AGCCAG/  
2341 GAAGGAATAA TGTCAAGCCC CGGCCAGCAA GTGGGCTTTA TTGCATAAGT GACAT  
2401 TTTTCCCCAA GATAGAAAGG CAGGAGAGTG TCTTCTGCAT GAATATGAAG ATCTGG  
2461 CATCCGTGAT ACATTGAGGC TGTTCCCTGG GGGTCGTTAC CTTCCACGAG CAAAA  
2521 AGCCCCTTCA GAGCCAGATC CTGAGCAAGA TGAACAGAAA CTGAGGTTTT GTAAA  
2581 CCTTTATGGG CAGCAACCCC GATCACCGGT GGAAATACGT CTTCAGCACG TCGCA  
2641 GTACCAAACA CATCACGCAT ATGATTAATT TGTTCAATTG TATAACCAAC ACGTTGC  
2701 ACCCGTCCTC GAATTTCCAT ATCCGGGTGC GGTAGTCGCC CTGCTTTCTC GGCATC  
2761 ATAGCCTGAG AAGAAACCCC AACTAAATCC GCTGCTTCAC CTATTCTCCA GCGCC  
2821 ATTTTCTCG CTTCCGGGCT GTCATCATT AACTGTGCAA TGGCGATAGC CTTCTG  
2881 TCATGACCAG CGTTTATGCA CTGGTTAAGT GTTTCCATGA GTTTTATTCT GAACATC  
2941 TAATCATTGC TTTGCGTTTT TTTATTAAT CTTGCAATTT ACTGCAAAGC AACAACA  
3001 TCGCAAAGTC ATCAAAAAAC CGCAAAGTTG TTTAAAATAA GAGCAACACT AAAAA  
3061 ATAAGAAGAG CACATACCTC AGTCACTTAT TATCACTAGC GTCGCCGCA GCCGTC  
3121 CGAGCATAGC GAGCGAACTG GCGAGGAAGC AAAGAAGAAC TGTTCTGTCA GATA  
3181 ACGCTCAGCG CAAGAAGAAA TATCCACCGT GGGAAAAACT CCAGGTAGAG GTAC/  
3241 GGATAGCCAA TTCAGAGTAA TAACTGTGA TAATCAACCC TCATCAATGA TGACGA  
3301 ACCCCCGATA TCAGGTCACA TGACGAAGGG AAAGAGAAGG AAATCAACTG TGAC/  
3361 CCCTCAAAAT TGGCTTCCTT AAAAATTACA GTTCAAAAAG TATGAGAAAA TCCATGC  
3421 CTGAAGGAAA CAGCAAACCT GTGACAAATT ACCCTCAGTA GGTCAGAACA AATGT  
3481 ACCACCCTCA AATCTGTGAC AGATAACCCT CAGACTATCC TGTCGTCATG GAAGTE  
3541 CGCGGAAGGA AAATACGATA TGAGTCGTCT GCGGCCTTT CTTTTTCTCA ATGTAT  
3601 GCGCATTGG AGTTCTGCTG TTGATCTCAT TAACACAGAC CTGCAGGAAG CGGCG  
3661 AGTCAGGCAT ACGCTGGTAA CTTTGAGGCA GCTGGTAACG CTCTATGATC CAGTC  
3721 TCAGAGAGAC GATGCCTGAG CCATCCGGCT TACGATACTG ACACAGGGAT TCGTA  
3781 GCATGGCATA CGGATTGGTG ATTTCTTTTG TTTCACTAAG CCGAAACTGC GTAAAC  
3841 TCTGTAACCC GATAAAGAAG GGAATGAGAT ATGGGTTGAT ATGTACACTG TAAAGC  
3901 TGGATGGACT GTGCGCACGT TTGATAAACC AAGGAAAAGA TTCATAGCCT TTTTCA  
3961 CGGCATCTC TTCAGGGCGA TAAAAACCA CTTCTTTCC CGCGAAACTC TTCAT  
4021 GCCGTATATC CTTACTGGCT TCCGCAGAGG TCAATCCGAA TATTTAGCA TATTTAG  
4081 CATGGATCTC GCAGATACCG TCATGTTTCT GTAGGGTGCC ATCAGATTTT CTGATC  
4141 CAACGAACAG ATACAGCATA CGTTTTTGAT CCCGGGAGAG ACTATATGCC GCCTCA  
4201 GGTGTTTTGA CTGGACGATT CGCGGGCTAT TTTTACGTTT CTTGTGATTG ATAACC  
4261 TTTCCGCCAT GACAGATCCA TGTGAAGTGT GACAAGTTTT TAGATTGTCA CACTAA/

4321 AAAAGAGTCA ATAAGCAGGG ATAAC TTTGT GAAAAAACAG CTTCTTCTGA GGGCA/  
4381 TCACAGGGTT AAGGGCAATT TGTCACAGAC AGGACTGTCA TTTGAGGGTG ATTTG/  
4441 CTGAAAGGGC AATTTGTCAC AACACCTTCT CTAGAACCAG CATGGATAAA GGCCT/  
4501 GCGCTCTAAA AAAGAAGATC TAAAAACTAT AAAAAAATA ATTATAAAAA TATCCCC  
4561 GATAAGTGGG TAACCCCAAG GGAAGTTTTT TCAGGCATCG TGTGTAAGCA GAATAT  
4621 GTGCTGTTCC CTGGTGCTTC CTCGCTCACT CGAGGGCTTC GCCCTGTCGC TCGAC  
4681 CGAGCACTAC TGGCTGTAAG AGGACAGACC ACATCATGGT TCTGTGTTCA TTAGGT/  
4741 CTGTCCATTG CTGACATAAT CCGCTCCACT TCAACGTAAC ACCGCACGAA GATTTCT  
4801 GTTCCTGAAG GCATATTCAA ATCGTTTTCTG TTACCGCTTG CAGGCATCAT GACAGA/  
4861 TACTTCCTAT AAACGCTACA CAGGCTCCTG AGATTAATAA TGCGGATCTC TACGATA  
4921 GGAGATTTTC CCGACTGTTT CGTTTCGCTTC TCAGTGGATA ACAGCCAGCT TCTCTG  
4981 ACAGACAAAA ACAGCATATC CACTCAGTTC CACATTTCCA TATAAAGGCC AAGGCA  
5041 TTCTCAGGAT AATTGTTTCA GCATCGCAAC CGCATCAGAC TCCGGCATCG CAAACT  
5101 CCGGTGCCGG GCAGCCACAT CCAGCGCAA AACCTTCGTG TAGACTTCCG TTGA/  
5161 GGA CTTATGT CCCATCAGGC TTTGCAGAAC TTT CAGCGGT ATACCGGCAT ACAGCA/  
5221 CATCGCATAG GAATGGCGGA ACGTATGTGG TGTGACCGGA ACAGAGAACG TCAC/  
5281 AGCAGCAGCG GCGGCAACCG CCTCCCAAT CCAGTCTCTG ACCGTTCTGT CCGT/  
5341 CCAGATCCGC GCTTTCTCTG TCCTTCCTGT GCGACGGTTA CGCCGCTCCA TGAGC/  
5401 GCGAATAAAT ACCTGTGACG GAAGATCACT TCGCAGAATA AATAAATCCT GGTGTC  
5461 TTGATACCGG GAAGCCCTGG GCCAACTTTT GGCGAAAATG AGACGTTGAT CGGCA  
5521 GAGGTTCCAA CTTTCACCAT AATGAAATAA GATCACTACC GGGCGTATTT TTTGAG/  
5581 CGAGATTTTC AGGAGCTAAG GAAGCTAAAA TGGAGAAAAA AATCACTGGA TATAC/  
5641 TTGATATATC CCAATGGCAT CGTAAAGAAC ATTTTGAGGC ATTT CAGTCA GTTGCTC  
5701 GTACCTATAA CCAGACCGTT CAGCTGGATA TTACGGCCTT TTTAAAGACC GTAAAG/  
5761 ATAAGCACAA GTTTTATCCG GCCTTTATTC ACATTCTTGC CCGCCTGATG AATGCTC  
5821 CGGAATTCCG TATGGCAATG AAAGACGGTG AGCTGGTGAT ATGGGATAGT GTTCA  
5881 GTTACACCGT TTTCCATGAG CAAACTGAAA CGTTTTTCATC GCTCTGGAGT GAATAC/  
5941 ACGATTTCCG GCAGTTTCTA CACATATATT CGCAAGATGT GGCGTGTTAC GGTGAA/  
6001 TGGCCTATTT CCCTAAAGGG TTTATTGAGA ATATGTTTTT CGTCTCAGCC AATCCCT/  
6061 TGAGTTTCAC CAGTTTTGAT TAAACGTGG CCAATATGGA CAACTTCTTC GCCCCCC  
6121 TCACCATGGG CAAATATTAT ACGCAAGGCG ACAAGGTGCT GATGCCGCTG GCGAT  
6181 TTCATCATGC CGTTTGTGAT GGCTTCCATG TCGGCAGAAT GCTTAATGAA TTACAAC  
6241 ACTGCGATGA GTGGCAGGGC GGGGCGTAAT TGGGGTTTGA GGGCCAATGG AACCC  
6301 TACGTTTATG GTATAACTTA TTGATTATAA TACAGTATAC AAAGGTCCCT TTTCAGGG  
6361 CCTTTCGTAT GTTGTAGCTG ATTTTATTTT CTCTTTTTCT TTTGGGTGCT TTTAATAGC  
6421 ATATATGATG TTTCATATAA AGTTAAAAGT TTCCCATCT GTCTATCTAT AGCGTCATC  
6481 TTTTCAGGAT TTCTTAATTT CTGCAGCAGT TTAGATATAT ATTTTCGAGG TAACTTTA/  
6541 ATTAATGAAT TATGGGATTG ATACATTTCC TTTGTCCAAT CTAATCTTTT TCCTGATTT  
6601 AATACCTCAC TCTCATCTCT ATTAATTATA AAACCGAGCT TTCCATACGG ACCTGTTA/  
6661 TATGATTGTA ATTGTCTATA CTCAGATGGA CCTAATTCTT CAAAATTTTT AGCATCAA/  
6721 ACAACTTGTC TTGTTTTATA GTCCTCCAAT ACTCGTTTCC AAAAATCAGA TTTGCCAC  
6781 TTGGTGCCTA TAATATCTCG TCTCTGAACT GCGTTACCAT TTGGATGGGA CTTGATC  
6841 GTTAGGTGGG ATGCAAATAC TATTCTTAGT GCGTCTAAAC ACCATTGTTT AAATTCA  
6901 GCACCTTCAT TTCCTATCGG TATCTGATCT AGATGAGTAG TTATTTGACC TATTGTTT  
6961 TTTCTAATGG CTGAATTATC TGAAATAATA TTAATATCAT ATTCGTCATT TATCTCCTC  
7021 GCTTCCTCTG GAGCAAGTGC ATTACGATTT AGATTCAAAC CAAGCCAGTA ACATGG  
7081 ATTAATAATT TCTCATTACT TTCAAACCT TTATCTGGAG TTCGCCCGTC ATGGCAA/  
7141 GAATAGGATG AGGTGTTTTT ATCACGAATA CCAACAAATC CTACACTATA CAAACTT  
7201 AGAATTCCAC TTGCCTTTAA CAACTGTATT TCAGACGTTA TTTTAGGATC TCCATTTT

7261 TCGATTAATT CGAAAGATGC TTCTATTTTT TTTAAGCACG TATAAACTGT TAATTCAGI  
7321 TCAATGCTAC GAAATGCACT AGTTATAACC TGTATTGAAG GAAAGATCTT CTGATAC  
7381 TTCCAGAGAT CTTCAAGTCT GGCCATGGAA ATTGACTTGG CTGCATATTC TAGGTC/  
7441 TTTATGATAG TTTCTCTATT CTCTCTGAAT GCGGAAAAAA AAGCTTCATT CAACAATC  
7501 AGTAAATCCC TGGGCCGGTA AAGGGTAAAT TGCAAACATC GCTTAAAACC ATTCCT  
7561 TTAAGATCAT CCGCTGTGCA TCTATCCCAA ACTCGTTGAT CTTTCTCAAT ATCTAGC  
7621 AATGCTACTT TCATTCTTTT AGCTGACAGC ATTAGGAGTT GTGCCCAGTC CCAATGC  
7681 CTTATGACTT GACCCTCTAT ATTTCTCGAG TAATCAGGAT CTTCTTTTGA TAGCGAC  
7741 AATATATTAT CCCTTAAAAA AATTATTGGA CGAATGCATT TTGCTTTTTG ATTTAATTC  
7801 ATAGATGCAT ATGCTAGACC TGCAATGATT CCAATTCCTA TATTATCCGG TTCATACC  
7861 TCATCTAGCT TATCCATTAA TATGACAAC TTCCTGTCTG AGCGTTCAAG AAGTGAT  
7921 ATATTATTTT CTATTTCTGA GATATTCAA TTGAATTGAA GATCACCAAT TGATTCTTC  
7981 GGGTTATTTT CATCTAAATA CTCCTTTGCG ACAAGCCTAC ACTTTCTTAA AATGTCAC  
8041 TGTGCAGAAT TCCATTTTTT CAAATGTTCA TTCAACAATG TTTCTGATGA TATTTGAG  
8101 GACAATTTGT AATGAGATGA TATATATGAT GCTATCTCCA TTAGCATAGC GTATCGC  
8161 AATAGTCTTG TTGCTGCCCT TGCTAAATTA AATGATCCTG TAAATGGTTT CAACATTC  
8221 CTGAAACCAA TAATTTGAGA ATCGTCTGGT GAGAACTCA GGATTAATAT TTTTTTG  
8281 TTCTTCCAAT GTCATTTAG CTGAATAAAT AAAGCACTTT TACCTGTCCC TCGTCTAC  
8341 ACAACAATGG TCCTGTCATC AGTTTCAATT AGAGTCCTAA AGTCAGCAGT TTCAATC  
8401 GCATTAECTA ACATCTTTTT ATCATTTTCT GCTGTGCTAT CACCAAACGG ATTAGACT  
8461 GAAGTAATAT TCAATCCAT ATTCAACCTT TTATGTTAGT TGCTTTCATT TACTACTTT/  
8521 TATACTGTTG AACGAGCAAT ATTCATTGTT TTTGATATAT GTGAGGCACC TAACCCC  
8581 TGCCACATAT TTAATACTGC ATCTCTATCT ATTTTTCTTT TTCTACCAA AACAACCTCC  
8641 TTTGCCATTG CCTCTTGGCG ACCTTCATTG GTACGCTCTA GTATTCTCTG TCGTTCT/  
8701 TGGGCCACTG CAGATAGAAT AGTGACAACC ATTTTACCCA TCTCCCCATC GGTACT  
8761 CCGTCATCAA TAAACCGAAT GGATACACCT TGGGCGTCAA ACTCTTTTAT TAACTGC  
8821 ATGTCAGCAG TATCGCGCCC AAGGCGGTCA AGTTTCTTCA CCAAGATGAC GTCAC  
8881 TCCACCTTCA TCCTCAGCAA GTCCAGCCCT TTCCGATCGC TTGAACTGCC CGATGC  
8941 TCAGTAAAGA TGCGATTTGC TTTACGCCT GCGTCTTTGA GTGCCCGAAC CTGAAT  
9001 AGAGATTGCT GGCTGGTTGA TACCCGTGCG TAACCAAAAA GTCGCATAAA AATGT/  
9061 AAATCAAATA TCGGACAAGC AGTGTCTGTT ATAACAAAA ATCGATTTAA TAGACAC  
9121 AACAGCACTG TTTTATGTG TGCGATAATT TATAATTTT CGGACGGTTG CAAATTC  
9181 AATGAATAAC TGTCAGGTAG GGAGCCTGAT ATGCCTGTG ACTTTCTAAC CTCTGA  
9241 AACAGAATT ACGGTTGTTA TGCTGCAGAA CCTAATGACG TGCAACTGGC GCGCT/  
9301 CATCTTGATG AACGGGATCT GGCCTTCATT AACCAACGAC GGGGCAAACA TAATAC  
9361 GGCATTGCGC TTCAGCTCAC CACAGCCCGT TTTCTGGGAA CATTCTGAC GGATTT  
9421 CAGGTTCTGC CTGGTGTTCA ACATTTTGTG GCGGTACAGC TTAATATCCA CCGTCC/  
9481 GTTCTCTCCC GCTATGCTGA ACGGGACACT ACCCTTAGAG AACATACTGC ATTAAT  
9541 GAATATTACG GCTATCATGA ATTTGGTGAT TTTCCATGGT CTTTCCGCCT GAAGCGT  
9601 CTATATACCC GGGCGTGGCT CAGTAATGAG CGACCGGGTC TGATGTTTGA TTTTGC  
9661 GCATGGTTGC TTCAAATAA GGTATTACTG CCCGAGCAA CCACACTAGT ACGTCT  
9721 AGTGAAATTC GTGAAAGGGC AAATCAGCGG CTGTGGAAAA AGCTGGCCGC ACTG  
9781 AAATGGCAGG CAGCTCAAGT GATGGAGCTT CTGGTCATTC CGGAAGGTCA GCGTC  
9841 GCACTGGAAC AGTTGAAAAA AGGCCCTGTT ACAGTCAGTG GACCTGCGTT TAATG  
9901 CTGGAACGAT ATATCCGATT ACGAAGTCTT GAGTTTTCCC GACTGAACTT TTCCGG  
9961 CCTGCCATTC AACTGCGTAA TCTGGCTCGT TATGCTGGCA TGGCGTCGGT AAAAT/  
10021 GCTCGAATGC CACAGCAGAG AAAGCTTGCT GTACTTACTG CATTCTGTTAA AGCAC  
10081 ATAACGGCAT TAGACGATGC CGTTGATGTG CTTGATATGC TAATTCTGGA CATTATC  
10141 GAAGCAAAGA AAACCGGGCA AAAAAAAGA CTCAGGACAC TGAAAGATCT TGAT

10201 GCATTGTTAC TGGCGCGGGC ATGTGCATTG TTGCTGGATG ATAATACAGA TGTCC  
10261 CTCAGGCAGG TTATCTTCAA GTGCGTACCC AAAAACAGAC TGGCAGAATC TGTA  
10321 GTTAATGAAC TTGCTCGTCC ACAGAACAAT AATTTCCATG ACGAAATGGT TGAGCA  
10381 GGTCGGGTTA AACGTTTTCT TCCGGCGGTG TTGCGGGACC TGCATTTCCG TGCGC  
10441 GCAGGTGAAC ATGTAAGTGC TGCATTGATG TATCTGGCAG AACTGAATGG TTCGA  
10501 CGCATCCTTG ATGATGCGCC TGAACATATT ATCACCGGTC CCTGGAAACG CCTCG  
10561 GATGCGGAGG GACGGATACA GCGTGCAGGT TATTCATGAT GTTTGCTGGA ACGC  
10621 GATGCACTGC GCCGCCGGGA CATCTGGCTT GAAAACAGTG ATCGCTGGGG AGAT  
10681 GAGAAGTTGT TGCAAGGTGA AGAGTGGCAG ACTCAGCGTA TTCCTGTCTG TCGG  
10741 GGACATCCTG TCGATGGACG TAAAGGTGTG CAACAACCTG CTATTCAGCT GGATC  
10801 TGGAAAGCCG TGGCATCACG ATTTGAAAAG AATGCGGAAG TTCATATCTG TAATG  
10861 AAATATCCAT CCCTGACTAT CAGTTGTCTG GAGAAACAGG AAGAGCCACC ATCAT  
10921 CGTCTAAATA ATCGGATCAA ACAGCTACTC CCACCGGTAG ATTTAACGGA ACTGTT  
10981 GAGATAGATG CCCAGACAGG ATTTACACAT GAGTTTTCGC ATGTCAGTGA ATCTG  
11041 CGAGCGCAAG ATTTGCACAT CAGTTTATGT GCGGTATTGA TGGCTGAAGC CTGTA  
11101 GGAAGTGAAC CGCTGATAAA GCACAATATA CCAGCACTGA CCCGCCATCG GCTC  
11161 GTGAAACAGA ATTACCTTCG TGCAGAAACG CTGGTCAGCG CCAATGCCCG CCTG  
11221 TTTCACTCCA CACTGGAGCT TGCTGGTCGT TGGGGAGGTG GAGAAGTGGC ATCA  
11281 GGCATGCGCT TTGTCACACC AGTGAAGACC ATCAACTCAG GATCTAACAG AAAAT  
11341 GGTTCCTGGAC GAGGCATCAC CTGGTATAAC TTCGTATCTG ATCAGTACTC TGGGT  
11401 GGCATTGTGG TACCCGGTAC ATTACGGGAT TCGATTTTTG TACTGGAAGG ACTTCT  
11461 CAGCAGACAG GGCTGAATCC AGTTGAAATC ATGACAGACA CTGCGGGTAG CAGC  
11521 ATTTTCGGTC TGTTCTGGCT ACTGGGGTAT CAGTTTTCCC CCCGGCTTGC CGATG  
11581 GAGGCGGTGT TCTGGCGGGT GAATAAATCG GCAAACACTG GAGTACTGGA TAAG  
11641 CGAGGATATG CAGATCTGTC AAAAGCGGAG AGTCAGTGGG ATGAGATGAT GCGA  
11701 GGTTGCTGTA AGTTGGGTAC AATTCATGCG TCAGAACTCA TTCGCTCTTT ACTGA  
11761 TCGCGCCCAT CAGGACTGGC ACAGGCAATT ATGGAAGTAG GGCCTGTAAC CAAA  
11821 TATCTCCTCA ATTATATTGA TGATGAAGAT TATCGTCGGC GGATCCTGAC GCAGCT  
11881 CGAGGAGAAG GCCGCCACGC TGTGGCTCGT GCGATTTGTT ACGGACAACG CGG  
11941 AGAAAGCGTT ATCGTGAAGG GCAGGAAGAT CAACTGGGGG CGCTGGGCCT GGT  
12001 GCAGTGGTTC TGTGGAACAC GCTCTATATG GAGGAAGCGT TGAGCTGGAT GCGC  
12061 GGCGAAGAAA TTATAGATGA AGATATCGCT CGGCTATCTC CCCTGATGCA CGGGC  
12121 AATATGTTGG GCCATTATAC ATTCACGTTG CCAGAGGATA TTTTAAAAGG GAAACT  
12181 GCTCTAAATT TAAATATAAA CAACGAATTA TCTCCTAAC GTACGTTTTT GTTCCATT  
12241 CCCTCAAACC CCAATTTTTT TAAGGCAGTT ATTGGTGCCC TTAACGCCT GGTGTC  
12301 CCTGAATAAG TGATAATAAG CGGATGAATG GCAGAAATTC GATGATAAGC TGTC  
12361 GAGAATTGGT CGACGGCCCA ACCATAGAGC CCACCGCATC CCCAGCATGC CTGC  
12421 CTTCCAATC CTCCCCTTG CTGTCCTGCC CCACCCACC CCCAGAATA GAATG  
12481 TACTCAGACA ATGCGATGCA ATTTCTCAT TTTATTAGGA AAGGACAGTG GGAGTG  
12541 CTTCCAGGGT CAAGGAAGGC ACGGGGAGG GGCAAACAAC AGATGGCTGG CA  
12601 GCACAGTCGA GGCTGATCAG CGGGTTTAAAC CTATTCCTTT GCCCTCGGAC GAGTG  
12661 GCGTCGGTTT CCACTATCGG CGAGTACTTC TACACAGCCA TCGGTCCAGA CGGCC  
12721 TCTGCGGGCG ATTTGTGTAC GCCCGACAGT CCCGGCTCCG GATCGGACGA TTGC  
12781 TCGACCCTGC GCCCAAGCTG CATCATCGAA ATTGCCGTCA ACCAAGCTCT GATAG  
12841 GTCAAGACCA ATGCGGAGCA TATACGCCC GAGCCGCGGC GATCCTGCAA GCTC  
12901 CCTCCGCTCG AAGTAGCGCG TCTGCTGCTC CATAAAGCC AACCACGGCC TCCA  
12961 GATGTTGGCG ACCTCGTATT GGAATCCCC GAACATCGCC TCGCTCCAGT CAATG  
13021 TGTTATGCGG CCATTGTCCG TCAGGACATT GTTGGAGCCG AAATCCGCGT GCACC  
13081 CCGGACTTCG GGGCAGTCCT CGGCCCAAAG CATCAGCTCA TCGAGAGCCT GCGC

13141 CGCACTGACG GTGTCGTCCA TCACAGTTTG CCAGTGATAC ACATGGGGAT CAGC/  
13201 GCATATGAAA TCACGCCATG TAGTGTATTG ACCGATTCTT TGCGGTCCGA ATGGG/  
13261 CCCGCTCGTC TGGCTAAGAT CGGCCGCAGC GATCGCATCC ATGGCCTCCG CGAC  
13321 CAGAACAGCG GGCAGTTCGG TTTCAAGCAG GTCTTGCAAC GTGACACCCT GTGC  
13381 GGAGATGCAA TAGGTCAGGC TCTCGCTGAA TTCCCAATG TCAAGCACTT CCGG/  
13441 GAGCGCGGCC GATGCAAAGT GCCGATAAAC ATAACGATCT TTGTAGAAAC CATCC  
13501 GCTATTTACC CGCAGGACAT ATCCACGCCC TCCTACATCG AAGCTGAAAG CACGA  
13561 TTCGCCCTCC GAGAGCTGCA TCAGGTCGGA GACGCTGTCG AACTTTTTCGA TCAG/  
13621 CTCGACAGAC GTCGCGGTGA GTTCAGGCTT TCCGGATCTA TCCATCTTTG GTACG  
13681 TGGCAAGCTT ATCACCGTGT TTTTCAAAGG AAAACCACGT CCCCCTGGTT CGGGC  
13741 AGACGTTTTT TTAACCTCGA CTAACACAT GTAAAGCATG TGCACCGAGG CCCCCA/  
13801 GATCCCATAC AATGGGGTAC CTTCTGGGCA TCCTTCAGCC CTTGTGTTGAA TACGCT  
13861 GAGAGCCATT TGA CTCTTTC CACA ACTATC CAACTC ACAA CGTGGCACTG GGGTT/  
13921 GCCTTTGCAG GTGTATCTTA TACACGTGGC TTTTGGCCGC AGAGGCACCT GTCGC  
13981 GGGGGTTC GCTGCCTGCA AAGGGTCGCT ACAGACGTTG TTTGTCTTCA AGAA/  
14041 AGAGGAACTG CTTCTTCAC GACATTCAAC AGACCTTGCA TTCCTTTGGC GAGAG  
14101 AGACCCCTAG GAATGCTCGT CAAGAAGACA GGGCCAGGTT TCCGGGCCCT CACA/  
14161 AAAGACGGCA ATATGGTGGG AAATAACATA TAGACAAACG CACACCGGCC TTATT/  
14221 CGGCTTCGGC CAGTAACGTT AGGGGGGGGG GAGGGAGAGG GGCAGGAAATC CTC  
14281 GCCGAGTCGC GGCCGCTTTA CTTGTACAGC TCGTCCATGC CGAGAGTGAT CCCG/  
14341 GTCACGAACT CCAGCAGGAC CATGTGATCG CGCTTCTCGT TGGGGTCTTT GTCFA  
14401 GACTGGGTGC TCAGGTAGTG GTTGTGCGGC AGCAGCACGG GGCCGTGCC GAT  
14461 TTCTGCTGGT AGTGGTCCGC GAGCTGCACG CTGCCGTCCT CGATGTTGTG GCGG  
14521 AAGTTCACCT TGATGCCGTT CTTCTGCTTG TCGGCCATGA TATAGACGTT GTGGCT  
14581 TAGTTGTA CTCCAGCTTGTG CCCCAGGATG TTGCCGTCCT CTTGAAGTC GATGC/  
14641 AGCTCGATGC GGTTCAACAG GGTGTCGCCC TCGAACTTCA CCTCGGCGCG GGTC  
14701 TTGCCGTCGT CTTGAAGAA GATGGTGC GC TCCTGGACGT AGCCTTCGGG CATG/  
14761 TTGAAGAAGT CGTGCTGCTT CATGTGGTTCG GGTAGCGGC TGAAGCACTG CACG  
14821 GTCAGGGTGG TCACGAGGGT GGGCCAGGGC ACGGGCAGCT TGCCGGTGGT GC.  
14881 TTCAGGGTCA GCTTGCCGTA GGTGGCATCG CCCTCGCCCT CGCCGGACAC GCTG  
14941 TGGCCGTTTA CGTCGCCGTC CAGCTCGACC AGGATGGGCA CCACCCCGGT GAAC  
15001 TCGCCCTTGC TCACCATGGT GCGGACTAG TGGATCCGAG CTCGGTACCA AGCT  
15061 GCCAGCTTGG GTCTCCCTAT AGTGAGTCGT ATTAGTACCA AGCTAATTCC TCACG/  
15121 TGA AATGGAA GAAAAAACT TTGAACCACT GTCTGAGGCT TGAGAATGAA CCAAC  
15181 AACTCAAAA GGGCAAATTC CAAGGAGAAT TACATCAAGT GCCAAGCTGG CCTAA  
15241 GTCTCCACCC ACTCAGTGTG GGAAACTCC ATCGCATAAA ACCCCTCCCC CCAAC  
15301 GACGACGTAC TCCAAAAGCT CGAGAACTAA TCGAGGTGCC TGGACGGCGC CCGC  
15361 GTGGAGTCAC ATGAAGCGAC GGCTGAGGAC GGAAAGGCC TTTTCTTTG TGTG  
15421 TCACCCGCC GCTCTCCCGA GCGCCGCGTC CTCCATTTTG AGCTCCCTGC AGCA/  
15481 GGAAGCGGCC ATCTTTCCGC TCACGCAACT GGTGCCGACC GGGCCAGCCT TGCC  
15541 GCGGGGGCGA TACACGGCGG CCGGAGGCCA GGCACCAGAG CAGGCCGGCC AG  
15601 TACCCCGTC CGATTCTCGG TGGCCGCGCT CGCAGGCCCC GCCTCGCCGA ACAT  
15661 TGGGACGCAC GGGCCCCGTC GCCGCCGCG GCCCAAAA CCGAAATACC AGT/  
15721 TCTTGGCCCG CATTTACAAG ACTATCTTGC CAGAAAAAA GCGTCGCAGC AGGTC  
15781 AAATTTTAAA TGGCTAGAGA CTTATCGAAA GCAGCGAGAC AGGCGCGAAG GTGC/  
15841 ATTCGCACGC GGCGGCCCA GCGCCAGGC CAGGCCTCAA CTCAAGCACG AGG  
15901 GCTCCTTAAG CGCAAGGCCT CGAACTCTCC CACCCACTTC CAACCCGAAG CTCGC  
15961 AGAATCACGT ACTGCAGCCA GGTGGAAGTA ATTC AAGGCA CGCAAGGGCC ATAA  
16021 AAGAGGCCAG GCCCGCGGA ACCACACAG GCACTTACCT GTGTTCTGGC GGC/



16081 TTGCGAAAAA GAACGTTAC GCGACTACT GCACTTATAT ACGGTTCTCC CCCAC  
16141 GGAAAAAGGC GGAGCCAGTA CACGACATCA CTTTCCCAGT TTACCCCGCG CCAC  
16201 TAGGCACCGG TTCAATTGCC GACCCCTCCC CCCAACTTCT CGGGGACTGT GGGC  
16261 CGCTCTGCCC ACTGACGGGC ACCGGAGCAT AACTTCGTAT AGCATACATT ATACG  
16321 ATATCGAT

//

RA  
√KE  
iI  
\_L  
√EAF

†  
√K  
∫T  
DES  
TLY

›GE  
ᶓQGLG

ˆL  
/LL  
‹KG  
ᶓQ  
.L  
ᶓYGR  
/Y  
[PVC R  
!EEP  
M  
WG  
;TLRD  
.VN  
'SGL  
‹RY

-INM

GTA  
GCAG  
ᄁACGA  
ᄁCTG  
ᄁAGTGG  
ᄁAGACT  
ᄁACGA  
ᄁCATGG  
ᄁATCA  
ᄁGAGTG  
ᄁCAGTC  
CCAGT  
AAAC  
ᄁTAT  
ᄁCAA  
ATGA  
ᄁAGC  
ᄁAA  
ᄁAGAGC  
AAAT  
TTGC  
ᄁATAA  
ᄁTAAG

CTTCG  
CAGTGC  
TTCTC  
CGCAA  
ATCGG  
TTTGG  
GAAA  
.AGAG  
TTCA  
.TCC  
iTACA  
\AAAAC  
.TCAGCA  
`GACA  
iTGGGC  
\ACAG  
CGTCC  
}TACC  
CACGT  
.CGCCA  
.ATCGC  
TCA  
.TCTG  
}GGTT  
CATT  
:CTT  
AA  
\GGAG  
}TAAC  
GCTCTT  
ACACGC  
ACTA  
AAACTG  
}AGG  
`GACGA  
}ATAT  
GAGA  
}GCGGA  
GATTT  
.TAAAC  
CGGT  
}CCTC  
\TCGC  
`GCCT  
}CAA  
TGGT  
\GTGA  
}CTG  
ATAA

ATTTG  
TCACA  
ACAAG  
GTG  
TATAA  
TGCGG  
TTGTT  
TATT  
ACAC  
ATG  
TTTA  
TTTA  
GCAC  
ACTGAT  
ATGTG  
ACCGTC  
CACTTC  
TTATC  
CCTG  
ACGTAA  
TTAT  
CACCG  
AAT  
AAAA  
ATC  
CCCTT  
CACG  
AACC  
GGG  
TTTT  
TCAGG  
AGT  
AAAACG  
iAC  
:C  
GT  
TT  
C  
AA  
AA  
CCA  
TCT  
.GTG  
TA  
T  
iATGA  
AT  
TGG  
CT

GT  
:TCT  
AGTG  
SAT  
CCCT  
TTA  
CAAC  
CTA  
A  
GCC  
ACT  
:T  
DCT  
iAT  
CAT  
SAT  
ITCT  
DCA  
GAAA  
TTT  
A  
TGT  
:T  
GCC  
GATT  
SATC  
CTTCC  
DCTTG  
ATCG  
ATCCT  
DATT  
GTT  
CCAA  
ATTTT  
GGCTG  
AACT  
AGAA  
TAAG  
CTG  
DCACT  
TCATC  
CCGAAC  
STATCA  
iAAGCG  
TCTG  
ATATC  
AGGAA  
DGGC  
CAGGCC

CAGAT  
GCAAG  
AGTAC  
GCACCG  
AAAAG  
TATAC  
CTTCAG  
TCCTCGC  
GCACTG  
GAGACC  
AAGGT  
TGCTT  
TACTT  
GTGCT  
ATATC  
AGTTGG  
GTTGAT  
GCTGAC  
ATTTT  
TCCAT  
TTGAG  
GATATT  
GAGGT  
TTGGCC  
ACCGCT  
AAAGC  
ACGCTA  
TAAT  
AGAGATC  
TACTAAT  
CGTAAT  
ATATC  
GAGA  
TGG  
TACG  
AACAT  
TATTGT  
ACACC  
GCAC  
ACTAGAAG  
CTGGG  
CGCGCT  
GTCGCA  
AGTTG  
CGGATG  
GAAGAA  
ACCGC  
GAGGTG  
GACGGA



AATCGC  
CCGAA  
:CGGCTG  
:ACGGCG  
AATCGG  
;GCGCA  
.GATTC  
AAACTT  
iGGTTG  
;GGCCT  
GATCA  
TTGAG  
GTGCC  
:CAGGT  
GCTTCC  
GGGAA  
\TTGCCA  
CCAAG  
:TAGTGCG  
GCGGCG  
\GGGCG  
'GGGGTG  
;ATCTTG  
rGTTG  
CCTTC  
:TTGTAG  
GCGGAC  
;CCGTAG  
AGATGAAC  
;AACTTG  
:AGCTCC  
TACCTA  
\CACCC  
;ATCCA  
\CTTCA  
:CTAAA  
;TACTCC  
iGGTGAC  
;GGCCG  
:GCCAG  
;CTTGAGAC  
'GTGCGC  
GTGCAGA  
:ATCAA  
CACCCAG  
iCGAAGGG  
;GATCA  
.CCCGTA  
AAACCCG

CCTCG  
CTTCTC  
GATGTG  
AAGTT
